# Supplementary material
Source: HighWire-hosted journal article supplement (https://cmaj.ca/highwire/filestream/58574/field_highwire_adjunct_files/0/image-arnason-f.pdf)
Supplement: image-arnason-f.pdf [file image-arnason-f.pdf]

## IMAGES CLINIQUES

## L'hyperthyroïdie provoquée par un adénome hypophysaire

Thomas Arnason MD, David B. Clarke MDCM PhD, Syed Ali Imran MBBS

Une femme de 49 ans nous a été envoyée pour une hyperthyroïdie qui était difficile à maîtriser malgré un traitement par méthimazole. Ses symptômes comprennent des maux de tête, des palpitations, une douleur à l'œil gauche et des selles molles fréquentes. À son arrivée, son taux sérique de thyroïdostimuline (TSH) était de 10,45 mUI/L (normale de 0,35 à 5,5 mUI/L) et son taux de thyroxine libre ( $T_4L$ ) était de 17,8 pmol/L (normale de 11,5 à 22,7 pmol/L). Un arrêt du méthimazole pendant deux semaines a été prescrit, ce qui a entraîné une aggravation des symptômes. Des analyses de sang répétées ont montré un taux de TSH normal à élevé (5,21 mUI/L) et un taux de  $T_4L$  élevé (27,2 pmol/L). L'imagerie par résonance magnétique (IRM) de la selle turcique a révélé une masse pituitaire de 1,2 cm (figure 1). La patiente a subi une résection endoscopique transsphénoïdale transnasale<sup>1</sup>. À l'examen anatomopathologique de la masse réséquée (Annexe 1, accessible à l'adresse [www.cmaj.ca/cgi/content/full/cmaj.101244/DC1](http://www.cmaj.ca/cgi/content/full/cmaj.101244/DC1)), on a diagnostiqué un adénome hypophysaire à TSH. Les symptômes de la patiente ont disparu après l'intervention chirurgicale. Trois semaines après l'opération, les analyses de sang ont montré un taux de TSH de 1,19 mUI/L et un taux de  $T_4L$  de 9,7 pmol/L. Un traitement de remplacement à la lévothyroxine a été amorcé et, trois mois plus tard, la patiente était euthyroïdienne sur le plan biologique et clinique. Une IRM répétée a montré une excision complète de la tumeur.

Le diagnostic différentiel pour la sécrétion inappropriée de TSH ayant un taux élevé de  $T_4L$  inclut les interférences provenant d'anticorps hétérophiles et la résistance à l'hormone thyroïdienne. Les interférences des anticorps hétérophiles peuvent être écartées à l'aide de diverses stratégies de laboratoire. La résistance à l'hormone thyroïdienne peut être écartée à l'aide de tests biochimiques, notamment le test du rapport molaire sous-unité alpha/TSH, le test d'administration de la thyroïdolibérine et le test de la globuline spécifique<sup>2</sup>. La résistance à la TSH, qui s'exprime par un taux de TSH élevé mais des taux de  $T_4L$  diminués, ne doit pas être confondue avec la résistance à l'hormone thyroïdienne. Bien que l'IRM puisse fournir des preuves anatomiques d'un adénome hypophysaire, l'hypertrophie de

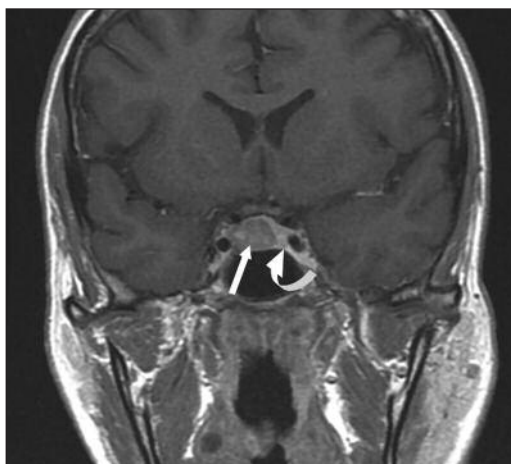

**Figure 1 :** Image par résonance magnétique coronale pondérée en  $T_1$  (avec rehaussement par le gadolinium) chez une femme de 49 ans, montrant un macro-adénome hypo-intense (flèche droite) remplissant le centre et le côté droit de la selle turcique. Le tissu normal pituitaire rehaussé (flèche courbe) est déplacé vers la gauche.

l'hypophyse peut également survenir chez des patients hypothyroïdiens en raison d'une hyperplasie thyroïdienne. La méthode de référence pour le diagnostic de l'adénome hypophysaire à TSH reste l'examen pathologique de la tumeur<sup>2</sup>.

Les adénomes hypophysaires qui produisent la TSH ne représentent que 1 % des adénomes hypophysaires fonctionnels<sup>3</sup>. Le plus souvent, les patients présentent des symptômes d'hyperthyroïdie ou de goitre diffus<sup>3</sup>. Bien que l'intervention chirurgicale soit définitive, les autres options thérapeutiques pour les patients symptomatiques incluent la radiothérapie et la prise en charge médicale. L'examen du traitement par somatostatine analogique à action prolongée, dans le cadre de huit études, a révélé une normalisation de l'hormone thyroïdienne chez 95 % des patients et une réduction de la taille tumorale dans 40 % des cas<sup>4</sup>.

## Références

- McGrath BM, Maloney WJ, Wolfsberger S, et coll. « Carotid artery visualization during anterior skull base surgery: a novel protocol for neuronavigation » *Pituitary* 2010;13:215-22.
- Khandwala H, Lee C. « Inappropriate secretion of thyroid-stimulating hormone » *CMAJ* 2006;175:351-3.
- DeLellis RA, Lloyd RV, Heitz PU, et coll., dir. *World Health Organization classification of tumours. Pathology & genetics: tumours of endocrine organs*. Lyon (FR): IARC Press, 2004. p. 9-39.
- Beck-Peccoz P, Persani L, Mannavola D, et coll. « Pituitary tumours: TSH-secreting adenomas » *Best Pract Res Clin Endocrinol Metab* 2009;23:597-606.

**Intérêts concurrents :**  
Aucun déclaré.

Cet article a été revu par les pairs.

**Affiliations :** Du Département de médecine de laboratoire, Division de pathologie anatomique (Arnason), du Département de chirurgie, Division de neurochirurgie (Clarke) et du Département de médecine, Division d'endocrinologie (Imran), du Queen Elizabeth II Health Sciences Centre, Université Dalhousie, Halifax, N.-É.

**Correspondance à :**  
D<sup>r</sup> Thomas Arnason,  
[tarnason@dal.ca](mailto:tarnason@dal.ca)

*CMAJ* 2011. DOI:10.1503/  
*/cmaj.101244*
